# Supplementary material for: Regulation of Aspergillus nidulans CreA-Mediated Catabolite Repression by the F-Box Proteins Fbx23 and Fbx47
Source: PubMed Central journal article supplement (PMC6016232; doi:10.1128/mbio.00840-18), 2018-06-19

**A**

*Fbx47-TAP* (Full length 1-1.125 bp)

*Fbx47.1-TAP* (F1 1-792 bp)

*Fbx47.2-TAP* (F2 1-780 bp)

**B**

Glucose

Xylose

WT Full F1 F2 WT Full F1 F2

*Fbx47::TAP* →

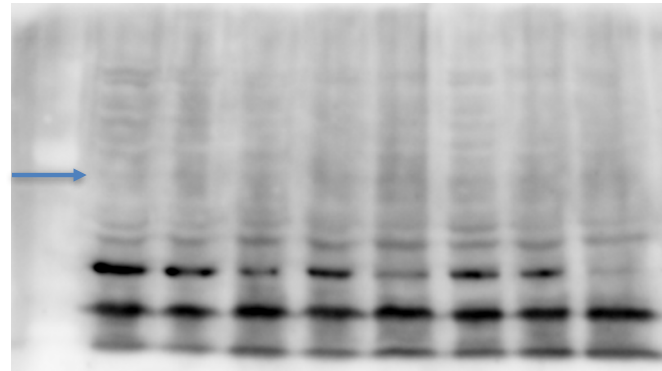

Supplement: mbo003183942sf2.pdf [file mbo003183942sf2.pdf]
