# Supplementary material for: Regulation of Aspergillus nidulans CreA-Mediated Catabolite Repression by the F-Box Proteins Fbx23 and Fbx47
Source: PubMed Central journal article supplement (PMC6016232; doi:10.1128/mbio.00840-18), 2018-06-19
Supplement: mbo003183942sf4.pdf [file mbo003183942sf4.pdf]

**A**

IP:HA Western blot: anti-GFP

**Xylan (24 hrs)**

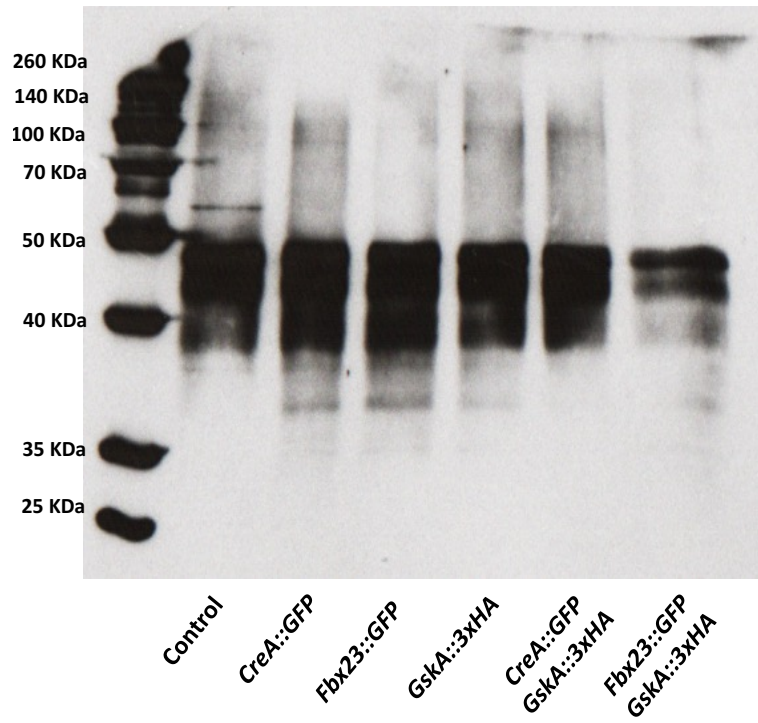

**B**

**Glucose (30 min)**

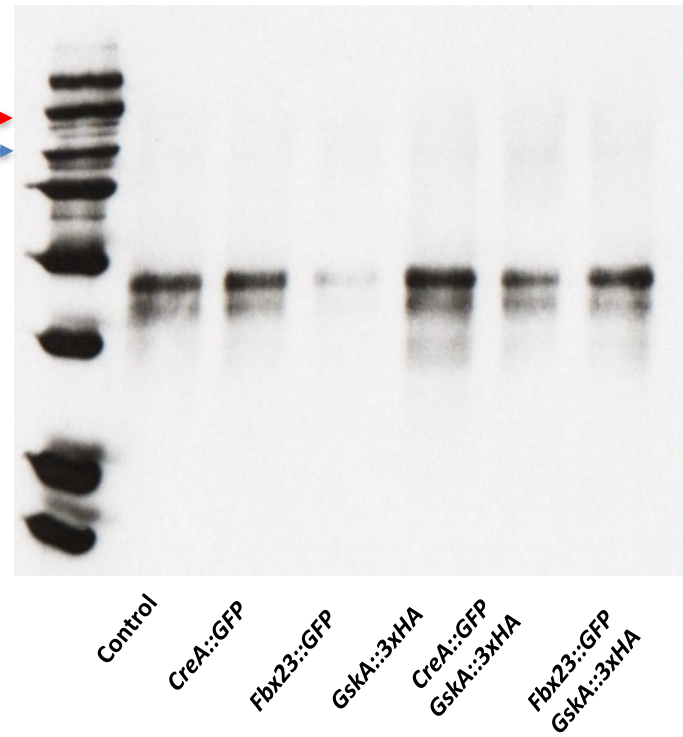

**S5**
