# Supplementary material for: Regulation of Aspergillus nidulans CreA-Mediated Catabolite Repression by the F-Box Proteins Fbx23 and Fbx47
Source: PubMed Central journal article supplement (PMC6016232; doi:10.1128/mbio.00840-18), 2018-06-19

**A**

IP:GFP Western blot: anti-HA  
Xylan (24 hrs)

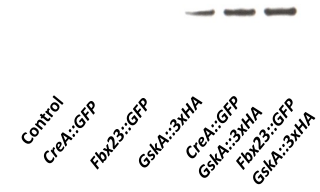

Xylan + Glucose (30 min)

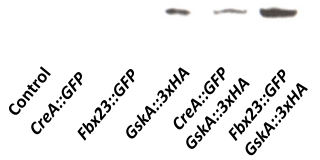

**B**

IP:GFP Western blot: anti-GFP  
Xylan (24 hrs)      Glucose (30 min)

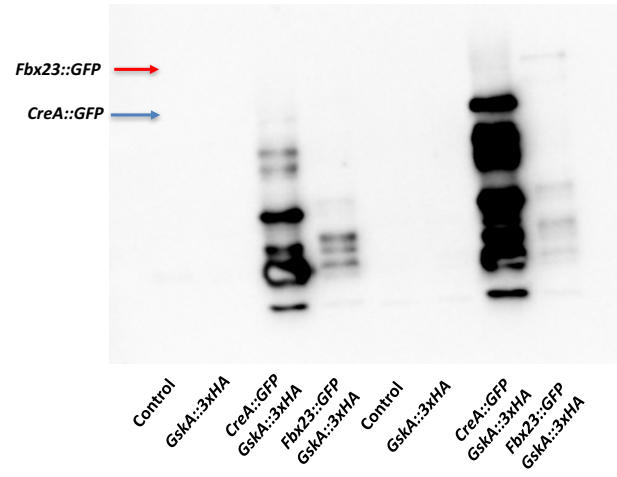

**C**

IP:FLAG Western blot: anti-GFP  
Xylan (24 hrs)      Glucose (30 min)

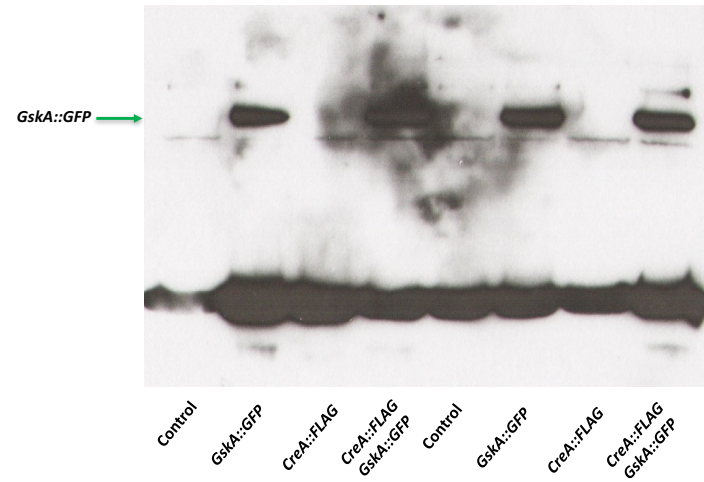

Supplement: mbo003183942sf5.pdf [file mbo003183942sf5.pdf]
